# Supplementary material for: Harnessing endogenous stem/progenitor cells for tendon regeneration
Source: JCI journal article supplement (doi:10.1172/jci81589), 2015-06-07
Supplement: sd1 [file 1]

Supplementary Figures

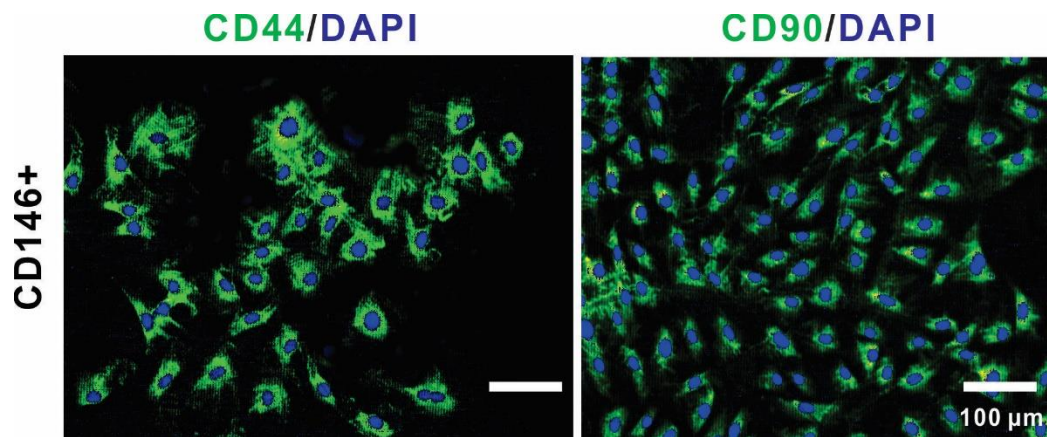

**Figure S1.** Expression of CD44 and CD90 in sorted CD146<sup>+</sup> tendon cells. CD146<sup>+</sup> cells isolated from rat PT were sorted by FACS. After 4 – 6 hours culture, the cells were fixed in formalin, and immunofluorescence was performed for CD44 and CD90. Images are selected as the representatives of 6 replicates total.

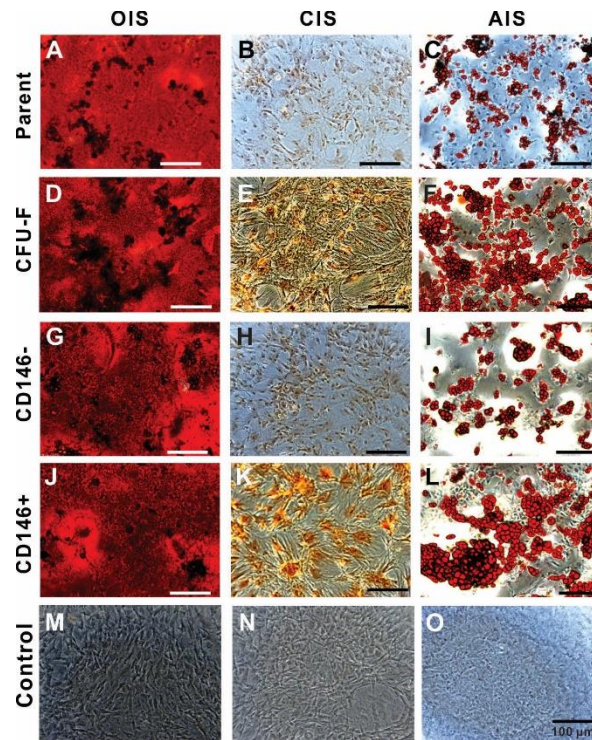

**Figure S2.** Multilineage differentiation of rat PT cells: Alizarin Red (AR) (A, D, G, J, M), Safranin O (Saf-O) (B, E, H, K, N), and Oil Red O (ORO) (C, F, I, L, O). Heterogeneous PT cells (A - C) and sorted CD146<sup>-</sup> cells (G - I) were able to differentiate into osteogenic (A, G) and adipogenic lineages (C, I) but failed to differentiate into chondrogenic lineage (B, H). However, single cell-derived clones (D - F) and sorted CD146<sup>+</sup> cells (J - L) were able to differentiate into all three lineages tested, with higher potential for adipogenic differentiation (F, L) as compared to heterogeneous and CD146<sup>-</sup> cells (C, I). Control groups without differentiation media show negative staining (M - O) (OIS: osteogenic induction supplements, CIS: chondrogenic induction supplements, AIS: adipogenic induction supplements). Scale: 100  $\mu$ m.

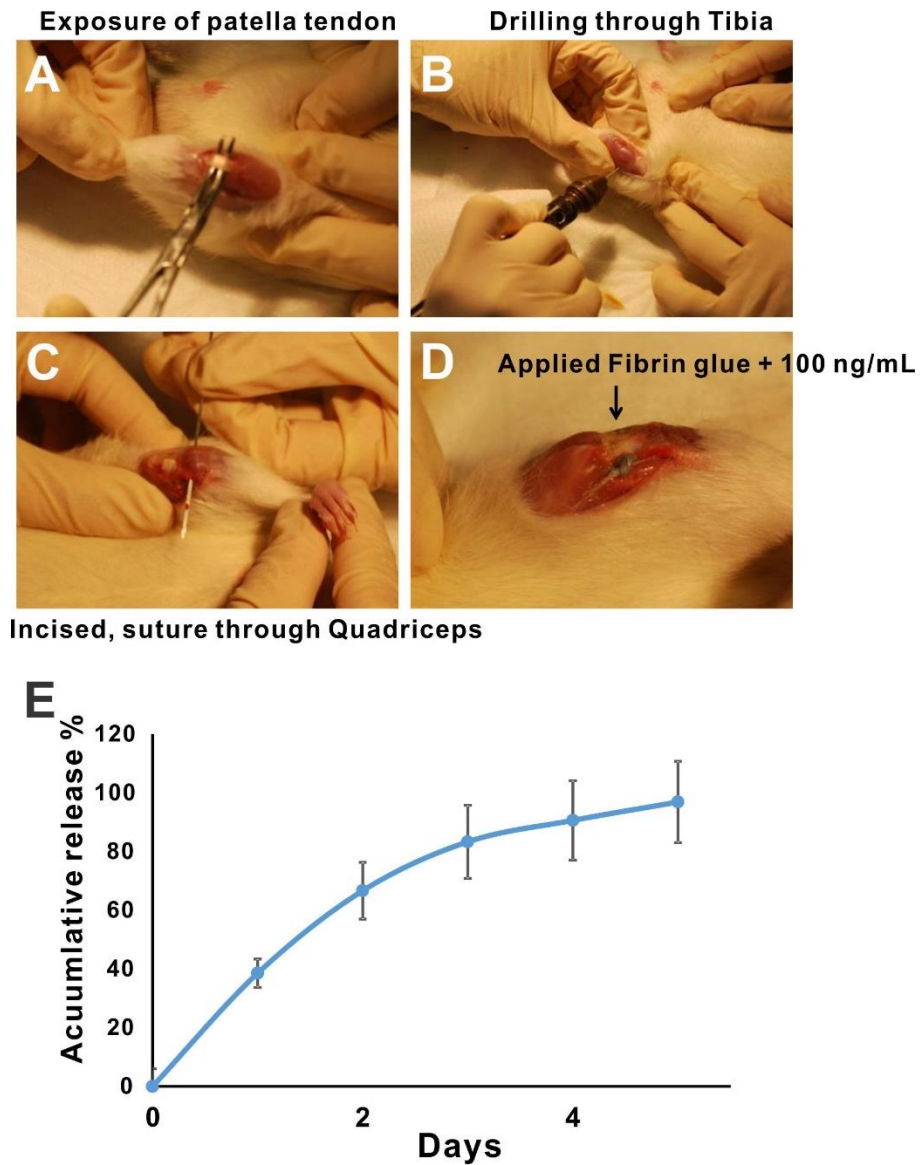

**Figure S3.** Surgical procedure for the rat PT repair. Upon exposure of the rat PT (A), a full-transection was made using a surgical blade. After creating a hole in the tibia (B), a cerclage suture was made through the tibia and quadriceps (C, D). Then we delivered 100 ng/mL CTGF in a 200  $\mu$ L fibrin gel (50 mg/mL fibrinogen + 50 U/mL thrombin). *In vitro* release test showed that CTGF loaded in fibrin gel was 100% released in 5 days (E).

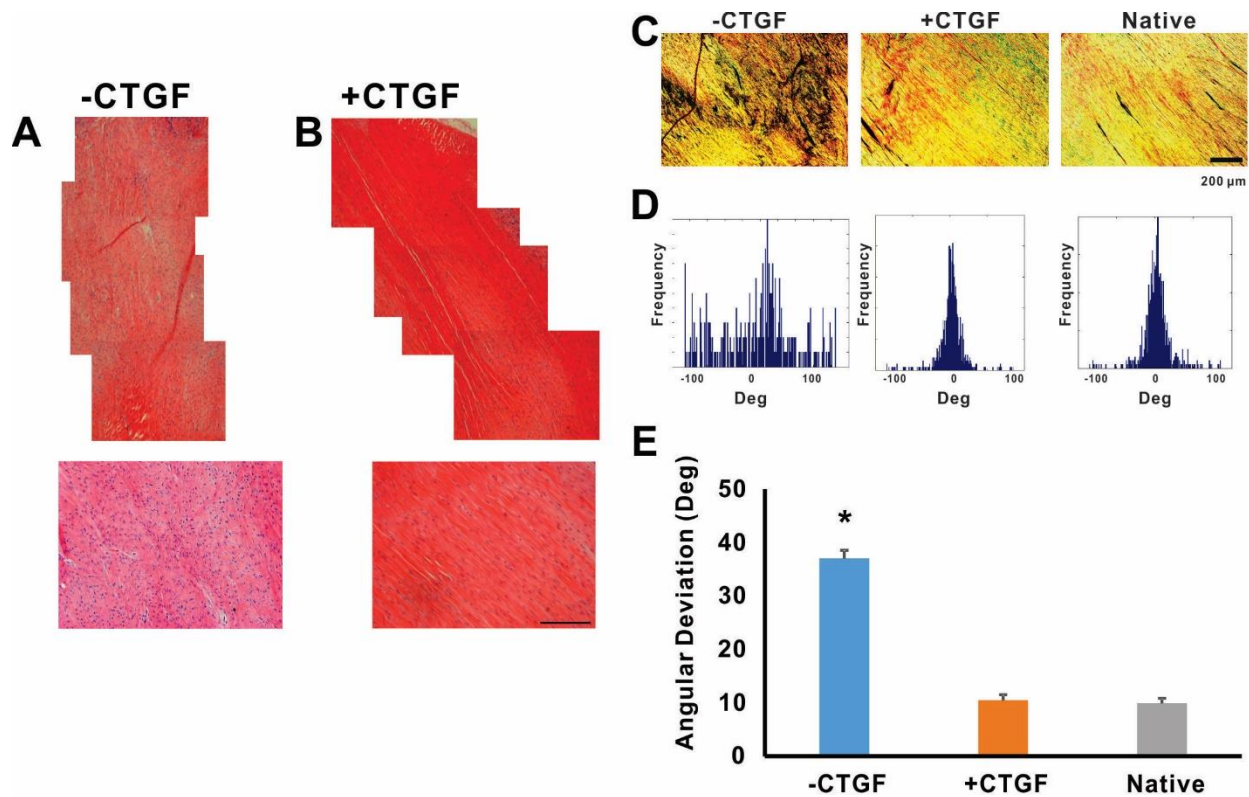

**Figure S4.** Histology of the regenerated PT at 4 wks. Tendon injury resulted in scar-like disorganized matrix with hypercellularity without CTGF for 4 wks (A), whereas CTGF delivery yielded native-like dense and aligned fibrous structure (B), consistent with data by 2 wks (**Fig. 3**). Collagen fiber orientation was assessed by Picrosirius Red staining (C), followed by an automated digital image processing for local directionality and angular deviation (AD) (D - E). Alignment of collagen fibers in the CTGF-regenerated tendon was similar to that of the native tendon, in contrast to disoriented fibers in scar-like tendon without CTGF (D). Quantitatively, the AD of fibers in samples without CTGF was significantly larger than the AD of CTGF-regenerated and native tendons (E).  $n = 6$  per samples, \*:  $p < 0.001$  compared to +CTGF and native, One way ANOVA with post-hoc Tukey HSD.

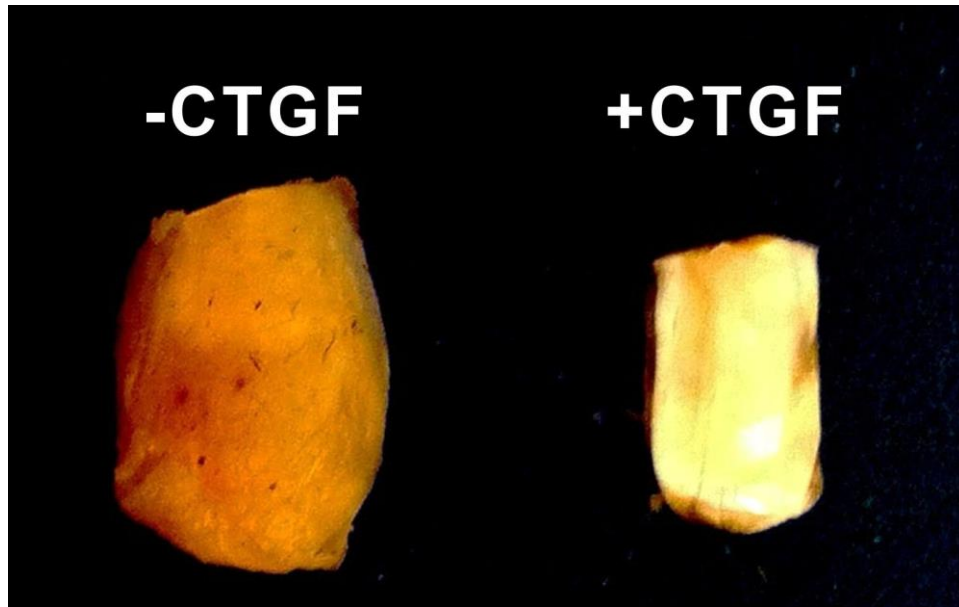

**Figure S5.** Rat PT tissues harvested at 4 wks post-op with or without CTGF delivery.

Macroscopic images taken using a digital camera demonstrated an obvious volumetric increase in the healed PT without CTGF as compared to the CTGF-regenerated PT.

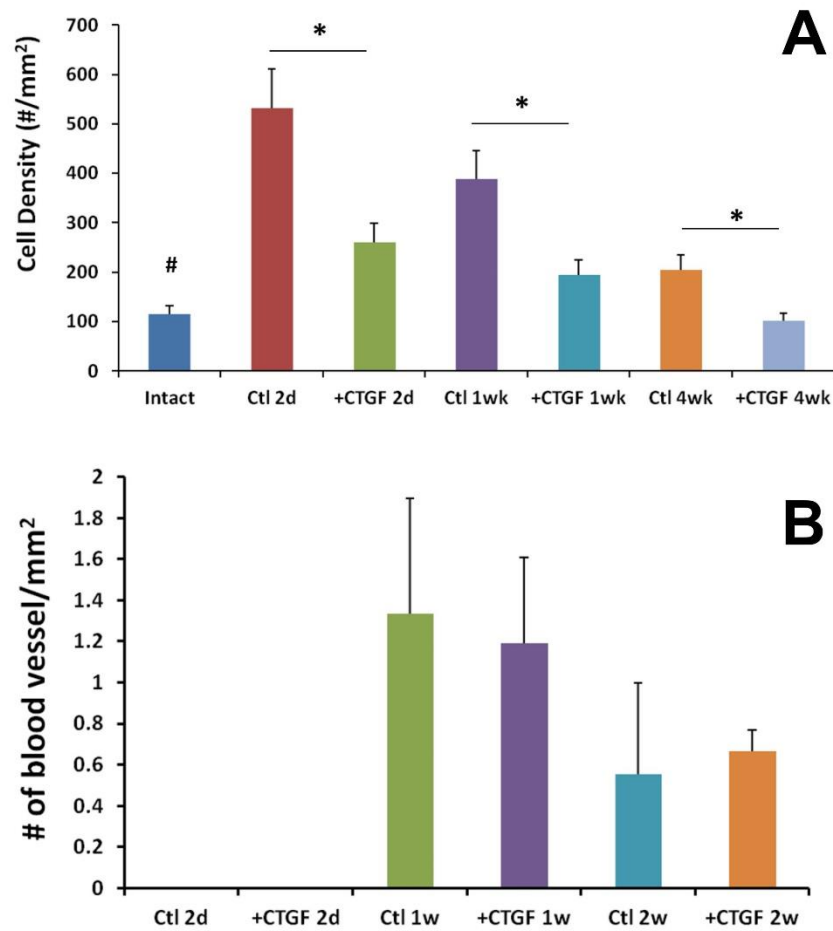

**Figure S6.** Quantitative analysis of the number of cells and blood vessels in the healing tendon. Total cell densities in the fibrin alone group were significantly higher than in the CTGF-delivered group by 4 wks (A). There was no significant difference in blood vessel number between the fibrin alone (control) and CTGF-delivered group (B). n = 10 randomly selected slides per group, \*:  $p < 0.001$ , One way ANOVA with post-hoc Tukey HSD.



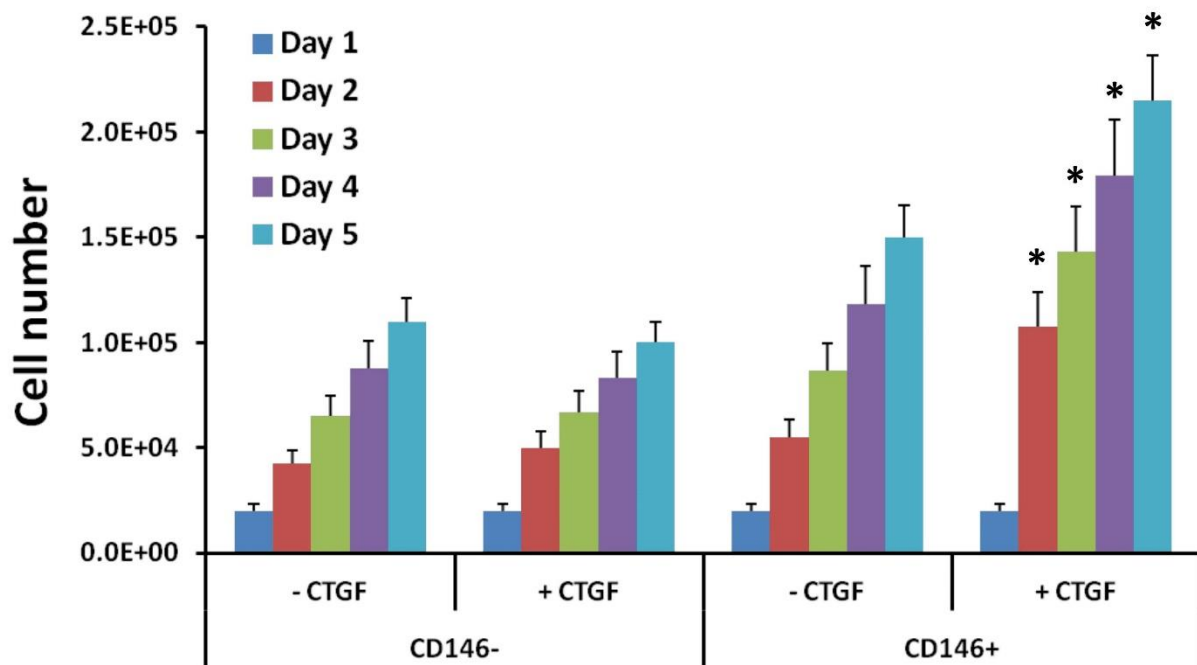

**Figure S7.** Cell proliferation promoted by CTGF. Isolated and sorted CD146<sup>+/+</sup> tendon cells were plated on 6 wells (20,000 cells/well) and cultured up to 5 days with or without 100 ng/mL CTGF. By 5 days, CTGF treatment significantly increased the total number of CD146<sup>+</sup> cells as compared to without CTGF. However, CTGF failed to affect the proliferation of CD146<sup>-</sup> cells. n = 6 biological replicates per group. \*: p<0.001 compared to untreated group, One way ANOVA with post-hoc Tukey HSD.

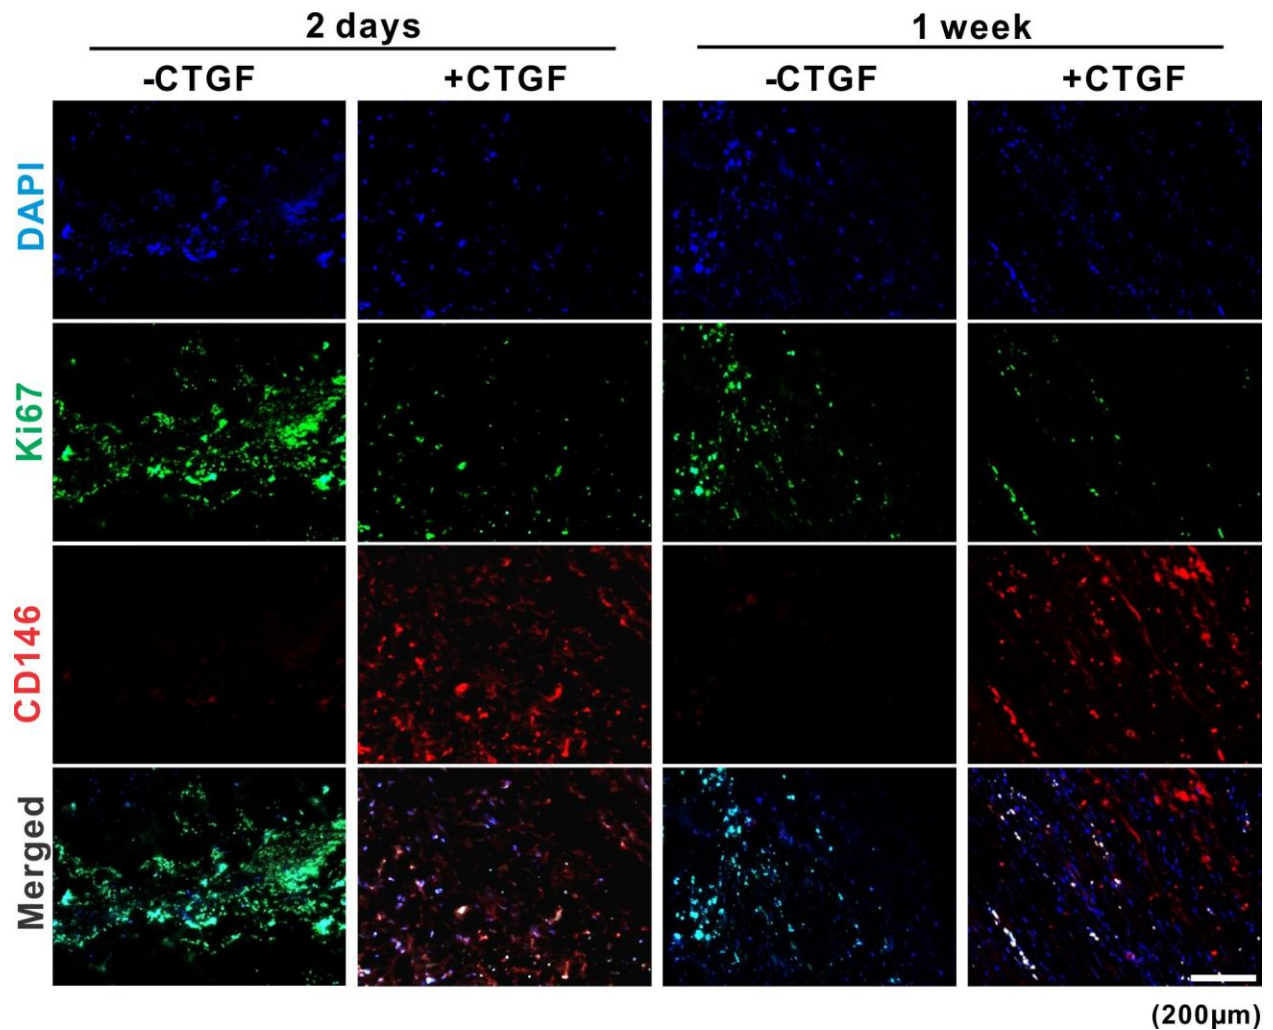

**Figure S8.** Ki67<sup>+</sup> proliferative cells in the healing tendon with or without CTGF delivery.

Abundant Ki67<sup>+</sup> cells were found in the tendon healing region without CTGF by 2 days that diminished by 1 wk. The majority of CD146<sup>-</sup> cells were Ki67<sup>+</sup> 2 days post-op, whereas over 65% (**Fig. 6A**) of CD146<sup>+</sup> cells were Ki67<sup>+</sup>. Images are selected as the representatives of 6 replicates total.



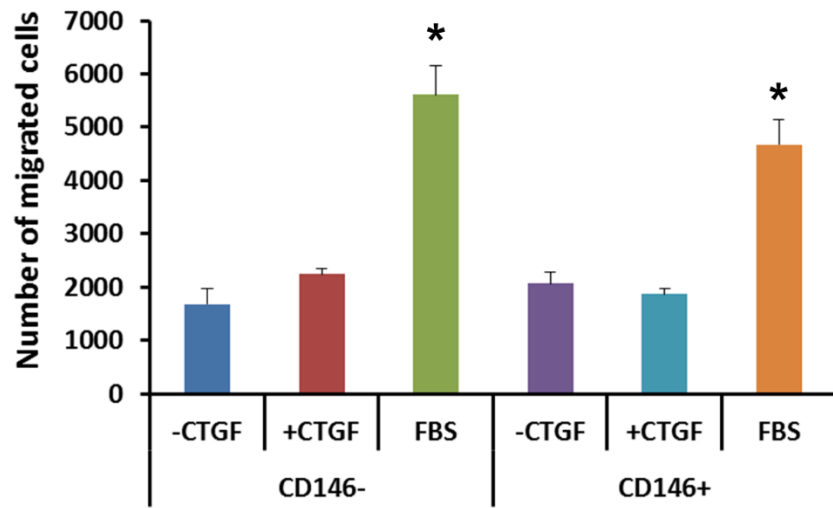

**Figure S9.** *In vitro* migration of CD146<sup>+/−</sup> tendon cells with CTGF. A boyden chamber-based migration assay (Cultrex<sup>®</sup> Cell Migration Assay, R&D Systems) was performed with and without 100 ng/mL CTGF with 10% FBS as a positive control. After 24 hours, the total number of migrated cells was not affected by the addition of CTGF both in CD146<sup>−</sup> and CD146<sup>+</sup> tendon cells. n = 6 per group, \*:p<0.0001 compared to other groups, One way ANOVA with post-hoc Tukey HSD.

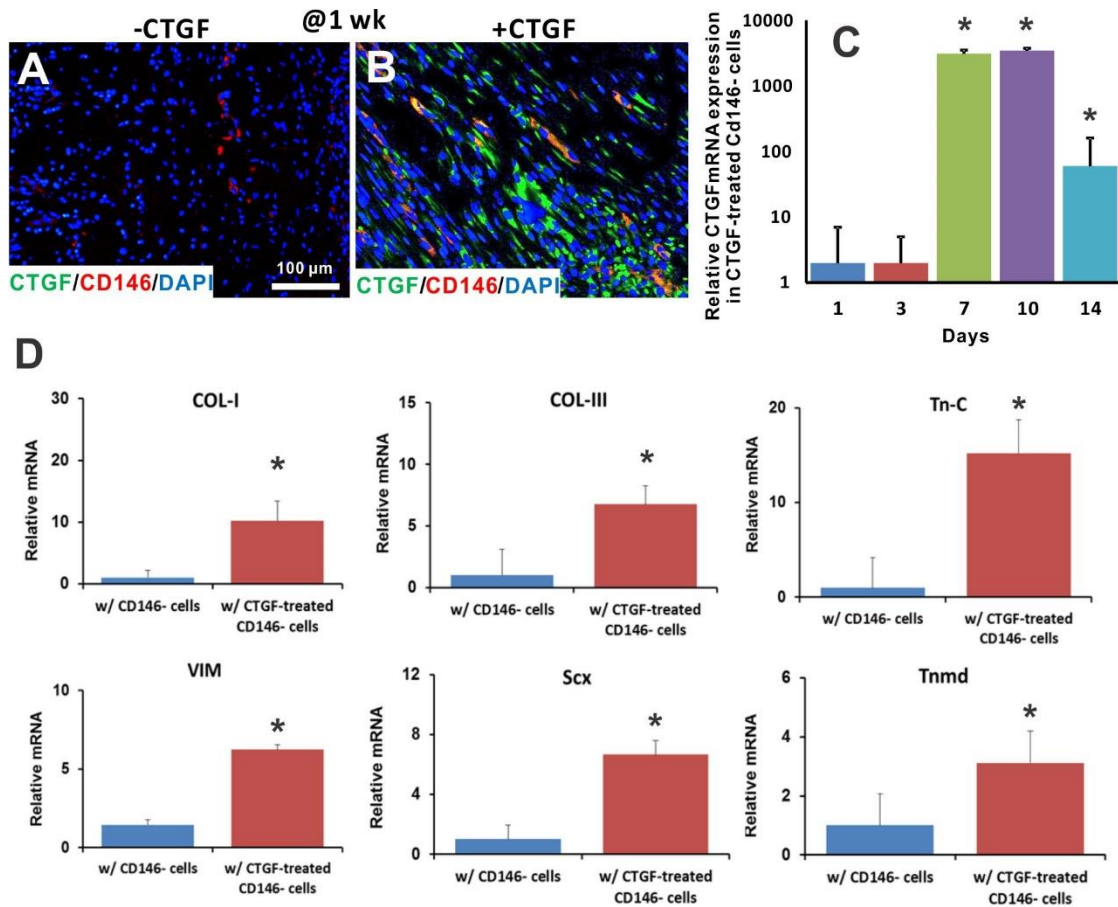

**Figure S10.** CTGF expression in CTGF-treated CD146<sup>+</sup> cells both *in vivo* and *in vitro*. At 1-wk post-op, abundantly more CD146<sup>+</sup> cells in the healing tendon with CTGF delivery expressed CTGF as compared to the healing tendon without CTGF delivery (A, B). *In vitro*, when CD146<sup>+</sup> rat PT cells were treated by 100 ng/mL CTGF at day 1, CTGF mRNA expression showed an over 3000 fold increase from day 7, followed by a gradual decrease (C). n = 6 biological replicates per group. \*: p < 0.00001 compared to the base line. When CTGF-once treated (1 day) CD146<sup>+</sup> cells were co-cultured with CD146<sup>+</sup> TSCs in 6 well Transwell® (Corning) system for 2 wks, tendon related gene expressions including COL-I and III, Tn-C, VIM, SCX, and Tnmd were significantly increased as compared to co-culturing with untreated CD146<sup>+</sup> cells (D). n = 6 biological replicates per group. \*: p < 0.001 compared to the control, One way ANOVA with post-hoc Tukey HSD.

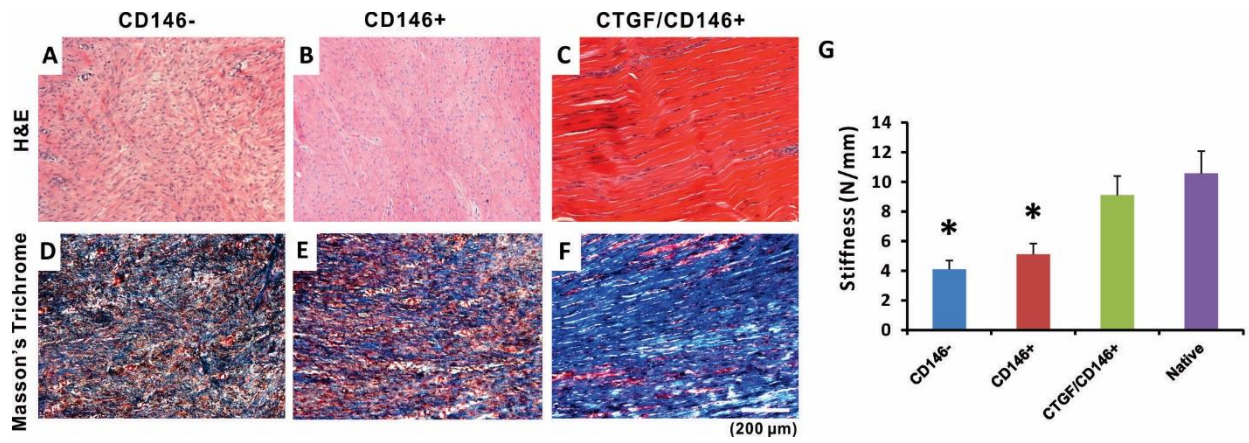

**Figure S11.** Tendon healing with cell transplantation. After 4 wks of cell transplantation (total 500,000 cells per sample), PT receiving CD146<sup>-</sup> cells (A, D) or untreated CD146<sup>+</sup> cells (B, E) showed unorganized scar-like tissue formation. However, transplantation of CD146<sup>+</sup> cells pretreated with CTGF for 1 wk resulted in reorganized collagen structure reminiscent of native tissue (C, F). Images are selected as the representatives of 6 replicates total. Tensile stiffness of healed tendon with CTGF-treated CD146<sup>+</sup> cells was on the level of that of the native tendon, in contrast to tendons receiving CD146<sup>-</sup> cells or untreated CD146<sup>+</sup> cells (G) (n = 6 per group, \*:p<0.001 compared to native; One way ANOVA with post-hoc Tukey HSD).
